# Supplementary material for: Assessing the performance of handheld LIBS for predicting soil organic carbon and texture in European soils
Source: Royal Society of Chemistry journal article supplement (doi:10.1039/d4ja00292j), 2024-01-01
Supplement: d4ja00292j1.pdf [file d4ja00292j1.pdf]

## 1. Supplementary Information

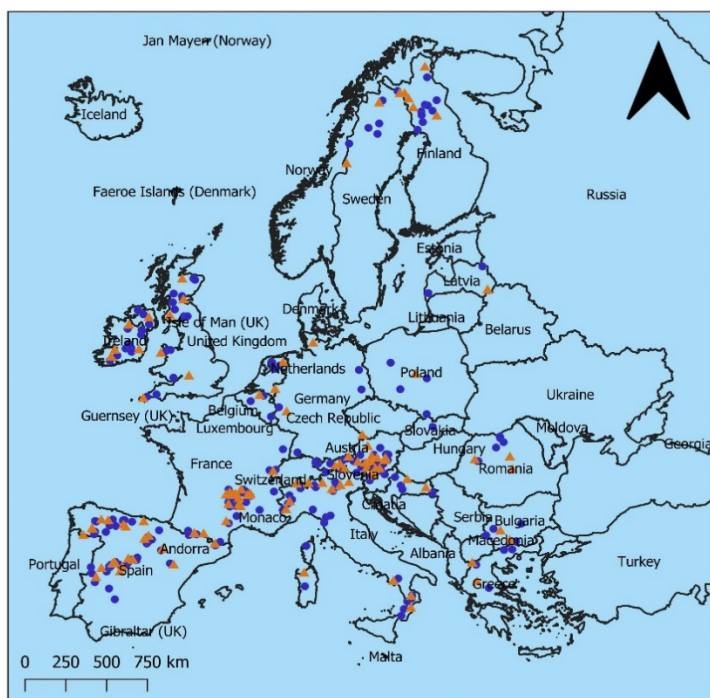

● Calibration (n=203) ▲ Validation (n=102)

**Figure S1.** Distribution across 21 European countries of the 305 soils used in this work and selected from the LUCAS 2015 database, with indication of calibration and validation samples

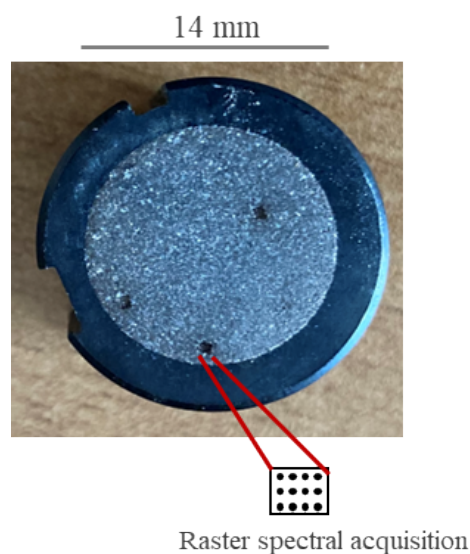

**Figure S2.** The three-raster points analysis on the pellet surface where the rectangle grid with the 12 (3 x 4) locations on which the three LIBS measurements were acquired.

**Table S1.** Number of samples selected from each European country

| No. | Country        | Number of selected samples |
|-----|----------------|----------------------------|
| 1   | Austria        | 41                         |
| 2   | Belgium        | 3                          |
| 3   | Bulgaria       | 6                          |
| 4   | Croatia        | 6                          |
| 5   | Finland        | 14                         |
| 6   | France         | 50                         |
| 7   | Germany        | 7                          |
| 8   | Greece         | 6                          |
| 9   | Ireland        | 14                         |
| 10  | Italy          | 37                         |
| 11  | Latvia         | 3                          |
| 12  | Luxemburg      | 1                          |
| 13  | Netherlands    | 5                          |
| 14  | Poland         | 5                          |
| 15  | Portugal       | 1                          |
| 16  | Slovakia       | 1                          |
| 17  | Slovenia       | 4                          |
| 18  | Spain          | 61                         |
| 19  | United Kingdom | 22                         |
| 20  | Romania        | 9                          |
| 21  | Sweden         | 9                          |

**Table S2.** Environmental conditions for measurements performed over five different days

| Day | Temperature (°C) | Humidity (%) |
|-----|------------------|--------------|
| 1   | 28               | 58           |
| 14  | 24               | 65           |
| 22  | 26               | 50           |
| 40  | 23               | 46           |
| 54  | 20               | 53           |

**Table S3.** Results from iPLSR and ANN prediction models for clay, silt, sand, and SOC

| Property | RMSECV <sup>a</sup><br>(%) | R <sup>2</sup> cv <sup>b</sup> | RMSEP <sup>c</sup><br>(%) | R <sup>2</sup> pred <sup>d</sup> | LV <sup>e</sup> | SRMSEP <sup>f</sup> | RPIQ <sup>g</sup> |
|----------|----------------------------|--------------------------------|---------------------------|----------------------------------|-----------------|---------------------|-------------------|
| iPLSR    |                            |                                |                           |                                  |                 |                     |                   |
| Clay     | 5                          | 0.5                            | 4                         | 0.6                              | 7               | 0.14                | 2.0               |
| Silt     | 9                          | 0.56                           | 10                        | 0.59                             | 7               | 0.15                | 2.3               |
| Sand     | 11                         | 0.64                           | 11                        | 0.66                             | 6               | 0.13                | 2.7               |
| SOC      | 1.51                       | 0.82                           | 2.35                      | 0.71                             | 10              | 0.13                | 2.5               |
| ANN      |                            |                                |                           |                                  |                 |                     |                   |
| Clay     | 6                          | 0.37                           | 4                         | 0.59                             | -               | 0.15                | 2.0               |
| Silt     | 11                         | 0.42                           | 9                         | 0.64                             | -               | 0.14                | 2.5               |
| Sand     | 15                         | 0.43                           | 11                        | 0.7                              | -               | 0.12                | 2.8               |
| SOC      | 2.22                       | 0.63                           | 2.58                      | 0.67                             | -               | 0.15                | 2.2               |

<sup>a</sup> root mean square error of cross-validation

<sup>b</sup> R<sup>2</sup> of cross-validation

<sup>c</sup> root mean square error of prediction

<sup>d</sup> R<sup>2</sup> of prediction

<sup>e</sup> number of factors (latent variables) applied in the model

<sup>f</sup> standardized root mean square error of prediction

<sup>g</sup> ratio of performance to interquartile distance
